# Supplementary material for: Lanpepsy is a novel lanthanide-binding protein involved in the lanthanide response of the obligate methylotroph Methylobacillus flagellatus
Source: PubMed Central journal article supplement — J Biol Chem. 2023 Jan 23;299(3):102940. doi: 10.1016/j.jbc.2023.102940 (PMC9988556; doi:10.1016/j.jbc.2023.102940), 2023-01-23
Supplement: mmc1.pdf [file mmc1.pdf]

## Supporting Information

### Lanpepsy is a novel lanthanide-binding protein involved in the lanthanide response of the obligate methylothrop *Methylobacillus flagellatus*

Jethro L. Hemmann, Philipp Keller, Lucas Hemmerle, Thomas Vonderach, Andrea M. Ochsner, Miriam Bortfeld-Miller, Detlef Günther, Julia A. Vorholt

#### Contents:

- Tables S1–S4
- Figures S1–S4

## Supporting Tables

**Table S1.** List of proteins induced in the presence of 20  $\mu$ M lanthanum. A q-value cutoff of  $<0.05$  and a fold-change cutoff of  $>4$  was applied and at least two unique peptides needed to be detected for each protein.

| Locus tag                | Description                                                            | Fold-change | q-value |
|--------------------------|------------------------------------------------------------------------|-------------|---------|
| Mfla_0344                | XoxF (La <sup>3+</sup> -dependent methanol dehydrogenase)              | 13.7        | 1.6E-07 |
| Mfla_2314                | XoxF (La <sup>3+</sup> -dependent methanol dehydrogenase)              | 9.6         | 2.3E-05 |
| Mfla_1632                | Acriflavin resistance protein                                          | 9.0         | 1.2E-04 |
| Mfla_2312                | XoxG (cytochrome <i>c</i> )                                            | 8.5         | 8.8E-06 |
| Mfla_1253                | TonB-dependent receptor                                                | 8.0         | 8.8E-06 |
| Mfla_0908,<br>Mfla_1052* | LanP (Propeptide, PepSY and peptidase M4)                              | 5.6         | 2.8E-03 |
| Mfla_1254                | Two component, sigma54 specific, transcriptional regulator, Fis family | 5.3         | 1.9E-03 |
| Mfla_0343                | GAF modulated sigma54 specific transcriptional regulator, Fis family   | 4.5         | 1.6E-03 |

\* The genome of *M. flagellatus* KT has been described to contain a large (potentially phage-related) duplication (22), thus both locus tags Mfla\_0908 and Mfla\_1052 refer to an identical protein sequence.

**Table S2.** List of proteins that showed decreased abundance in the presence of 20  $\mu$ M lanthanum. A q-value cutoff of <0.05 and a fold-change cutoff of >4 was applied and at least two unique peptides needed to be detected for each protein.

| <b>Locus tag</b>         | <b>Description</b>                                                               | <b>Fold-change</b> | <b>q-value</b> |
|--------------------------|----------------------------------------------------------------------------------|--------------------|----------------|
| Mfla_1724                | DUF3828 domain-containing protein                                                | 14.8               | 8.76E-05       |
| Mfla_2037                | MxaC, protein involved in Ca <sup>2+</sup> insertion into methanol dehydrogenase | 11.7               | 1.26E-02       |
| Mfla_0817                | Signal transduction histidine kinase, glucose-6-phosphate specific               | 10.8               | 3.46E-04       |
| Mfla_2035                | MxaL protein, putative                                                           | 10.2               | 1.82E-03       |
| Mfla_0816                | Two component transcriptional regulator, LuxR family                             | 10.0               | 2.24E-03       |
| Mfla_1185                | Thioredoxin                                                                      | 9.5                | 8.83E-06       |
| Mfla_2039                | MxaS, protein involved in methanol oxidation                                     | 9.4                | 4.95E-02       |
| Mfla_2038                | MxA, protein involved in Ca <sup>2+</sup> insertion into methanol dehydrogenase  | 9.1                | 1.61E-03       |
| Mfla_2041                | MxaI (Methanol dehydrogenase [cytochrome c] subunit 2)                           | 8.7                | 4.78E-02       |
| Mfla_2042                | MxaG (cytochrome c, class I)                                                     | 8.7                | 4.32E-02       |
| Mfla_2043                | MxaJ (Amino acid ABC transporter substrate-binding protein, PAAT family)         | 7.2                | 3.39E-02       |
| Mfla_2034                | MxaD protein, putative                                                           | 6.1                | 1.39E-02       |
| Mfla_2040                | MxaR (ATPase associated with various cellular activities, AAA_3)                 | 4.8                | 4.10E-03       |
| Mfla_0898,<br>Mfla_1042* | Uncharacterized protein                                                          | 4.3                | 7.25E-04       |

\* The genome of *M. flagellatus* KT has been described to contain a large (potentially phage-related) duplication (22), thus both locus tags Mfla\_0898 and Mfla\_1042 refer to an identical protein sequence.

**Table S3.** Characterization of LanP using isothermal titration calorimetry (ITC). The ITC cell contained 50  $\mu\text{M}$  LanP (Mfla\_0908) and the syringe 5 mM of the metal ligand; both were dissolved in 25 mM MOPS and 150 mM NaCl at pH 7.2. A control for the heat of dilution (injection of metal into buffer) was performed and subtracted from the measurement with protein. A model with two sets of sites was used to fit the isotherms of  $\text{La}^{3+}$ ,  $\text{Nd}^{3+}$ , and  $\text{Eu}^{3+}$ , while a model with one set of sites was fitted for  $\text{Ca}^{2+}$ . For  $\text{Fe}^{3+}$ , no fit could be obtained, suggesting no binding. Displayed thermograms are baseline corrected.

| Titrated metal  | Thermogram / isotherm plots | Thermodynamic parameters                                                                                                                                                                                                                                                                                                                                                                                           |
|-----------------|-----------------------------|--------------------------------------------------------------------------------------------------------------------------------------------------------------------------------------------------------------------------------------------------------------------------------------------------------------------------------------------------------------------------------------------------------------------|
| $\text{LaCl}_3$ |                             | $N_1$ (sites): $6.1 \pm 0.16$<br>$K_{D1}$ (M): $1.1 \cdot 10^{-6} \pm 0.10 \cdot 10^{-6}$<br>$\Delta H_1$ (kJ/mol): $0.47 \pm 0.83$<br>$-T\Delta S_1$ (kJ/mol): $-34.5$<br><br>$N_2$ (sites): $0.21 \pm 0.15$<br>$K_{D2}$ (M): $4.9 \cdot 10^{-6} \pm 1.2 \cdot 10^{-6}$<br>$\Delta H_2$ (kJ/mol): $210 \pm 150$<br>$-T\Delta S_2$ (kJ/mol): $-236$<br><br>Reduced Chi-Sqr. ( $\text{kJ}^2/\text{mol}^2$ ): 0.873  |
| $\text{NdCl}_3$ |                             | $N_1$ (sites): $6.1 \pm 0.31$<br>$K_{D1}$ (M): $1.1 \cdot 10^{-6} \pm 0.26 \cdot 10^{-6}$<br>$\Delta H_1$ (kJ/mol): $-1.5 \pm 0.89$<br>$-T\Delta S_1$ (kJ/mol): $-32.6$<br><br>$N_2$ (sites): $0.22 \pm 0.35$<br>$K_{D2}$ (M): $4.5 \cdot 10^{-6} \pm 1.2 \cdot 10^{-6}$<br>$\Delta H_2$ (kJ/mol): $240 \pm 380$<br>$-T\Delta S_2$ (kJ/mol): $-265$<br><br>Reduced Chi-Sqr. ( $\text{kJ}^2/\text{mol}^2$ ): 0.985  |
| $\text{EuCl}_3$ |                             | $N_1$ (sites): $6.4 \pm 0.31$<br>$K_{D1}$ (M): $1.1 \cdot 10^{-6} \pm 0.22 \cdot 10^{-6}$<br>$\Delta H_1$ (kJ/mol): $-1.8 \pm 0.66$<br>$-T\Delta S_1$ (kJ/mol): $-32.2$<br><br>$N_2$ (sites): $0.15 \pm 0.33$<br>$K_{D2}$ (M): $4.8 \cdot 10^{-6} \pm 0.68 \cdot 10^{-6}$<br>$\Delta H_2$ (kJ/mol): $330 \pm 770$<br>$-T\Delta S_2$ (kJ/mol): $-363$<br><br>Reduced Chi-Sqr. ( $\text{kJ}^2/\text{mol}^2$ ): 0.514 |
| $\text{CaCl}_2$ |                             | $N$ (sites): $4.3 \pm 0.41$<br>$K_D$ (M): $14 \cdot 10^{-6} \pm 11 \cdot 10^{-6}$<br>$\Delta H$ (kJ/mol): $-2.0 \pm 0.41$<br>$-T\Delta S$ (kJ/mol): $-25.8$<br><br>Offset (kJ/mol): $1.4 \pm 0.24^*$<br>Reduced Chi-Sqr. ( $\text{kJ}^2/\text{mol}^2$ ): 0.056<br><br>$^*$ Without the offset as a fitting parameter, no fit could be obtained.                                                                    |

---

FeCl<sub>3</sub>

No fit possible (no binding)

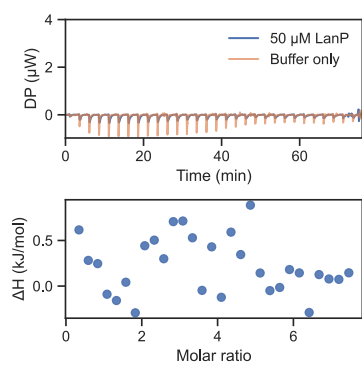

**Table S4.** List of primers used in this work.

| <b>Purpose</b>                                           | <b>Sequence</b>                                                                                          |
|----------------------------------------------------------|----------------------------------------------------------------------------------------------------------|
| PCR of homologous region upstream of Mfla_0343           | Fwd: TCATCTAGAAATCAGGCAGTCATTCCACTGTGGTC<br>Rev: CATGAAGCTCCTAGCCTAAAGACCAGGCACCCCTC                     |
| PCR of homologous region downstream of Mfla_0343         | Fwd: TTTAGGCTAGGAGCTTCATGGTTGATCGTAGGAAC<br>Rev: AACAAGCTTGCAGCAAAGCAATGCCTGTACG                         |
| PCR of homologous region upstream of Mfla_0908           | Fwd: CAGTCTAGACTATTGTGCCCAAGTAGCTTTATTC<br>Rev: ATCATTCTTTCCACCATTTATCTCCATATAATCA                       |
| PCR of homologous region downstream of Mfla_0908         | Fwd: AATGGTGGGAAAGGAATGATAGCTTTTTGACTGGAC<br>Rev: CTCTGCAGAGTGTGGCACTATCATATCGATTC                       |
| PCR of homologous region upstream of Mfla_1253           | Fwd: TTCTCTAGAGTCAGGAACAGCTCCTCAATCAG<br>Rev: TTTAATTGGTTTTTAACATACAATCCTTCCATAGTTG                      |
| PCR of homologous region downstream of Mfla_1253         | Fwd: TATGTTAAAAACCAATTAAGTACTGACTTATTATTGATTAC<br>Rev: GCAAAGCTTCACAATCTACATGCACGAAAGG                   |
| PCR of homologous region upstream of Mfla_1632           | Fwd: TGTTCTAGATCAACCAGCATGACCGCAATATTC<br>Rev: TTCAGGCCACCGACATCATGGGGTATCAGTCTCT                        |
| PCR of homologous region downstream of Mfla_1632         | Fwd: CATGATGTCGGTGGCCTGAAGGTTGGGATTCTCTG<br>Rev: TGGAAGCTTTATTGACGGTGTCACTGTCATCCTTG                     |
| PCR of Mfla_0908 for cloning into pET-16b                | Fwd: GCGCATATGGATCATCACTTTCCCAAAGGAAAGG<br>Rev: AACGGATCCTCATTCTTGCCAATCTGGTAAAAC                        |
| PCR for removal of His <sub>10</sub> -tag from Mfla_0908 | Fwd:<br>TTGGGAAAGTGATGATCCATGGTATATCTCCTTCTTAAAGTTAAACA<br>Rev: CTTTAAGAAGGAGATATACCATGGATCATCACTTTCCCAA |

## Supporting Figures

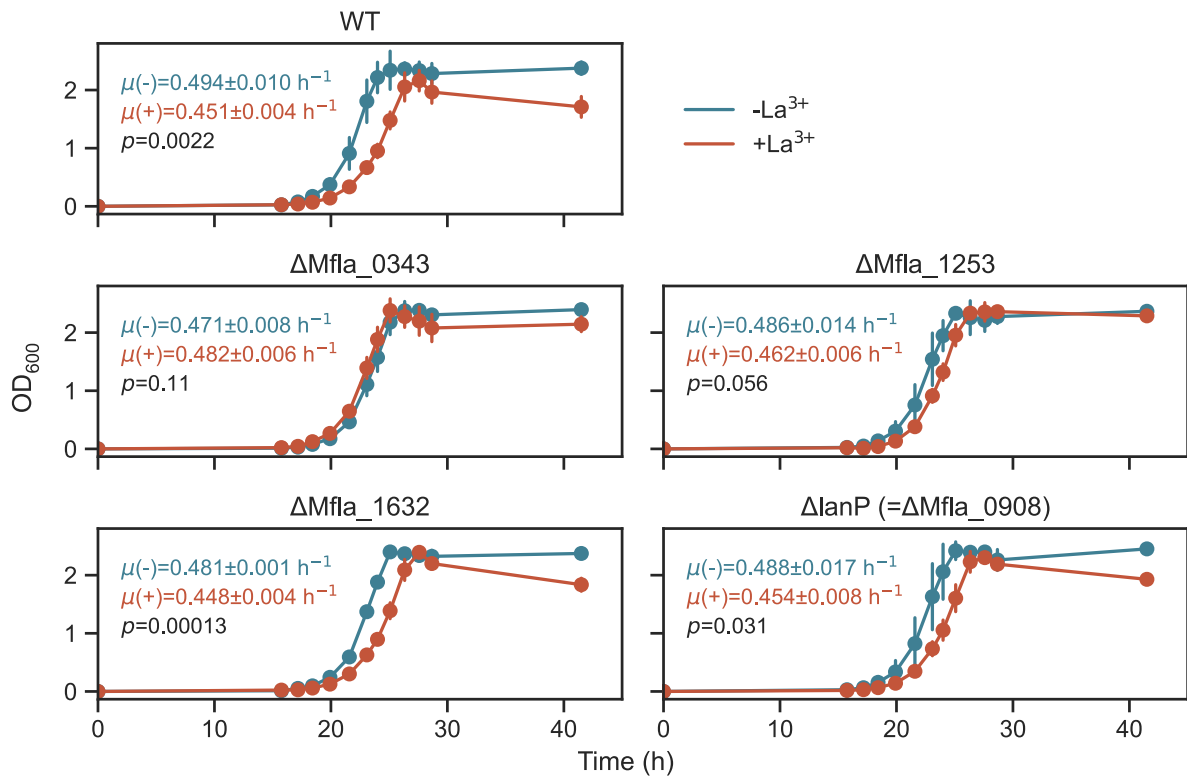

**Figure S1.** Growth curves of the wild type (WT) and deletion strains with (+) and without (-)  $La^{3+}$  addition (20  $\mu M$  final concentration). The error bars show the standard deviation of three biological replicates. The growth rate  $\mu$  was calculated from the best fit to the exponential growth of each replicate and reported as the mean value  $\pm$  standard deviation. The  $p$ -value originates from a  $t$ -test of the growth rates in presence and absence of  $La^{3+}$  for each strain.

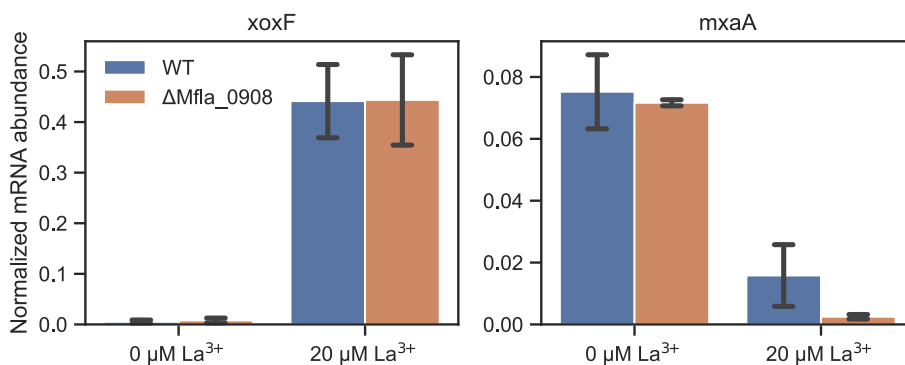

**Figure S2.** RT-qPCR analysis of *xox* and *mxA* cluster expression in *M. flagellatus* KT wild-type and  $\Delta Mfla_{0908}$  strains. The highly induced (judging from the proteomics data) genes *xoxF* (*Mfla\_0344*) and *mxmA* (*Mfla\_2038*) were used as marker genes for the expression of the corresponding gene clusters. mRNA abundances were normalized to the housekeeping (according to proteomics) gene *Mfla\_0284* (50S ribosomal protein L22).

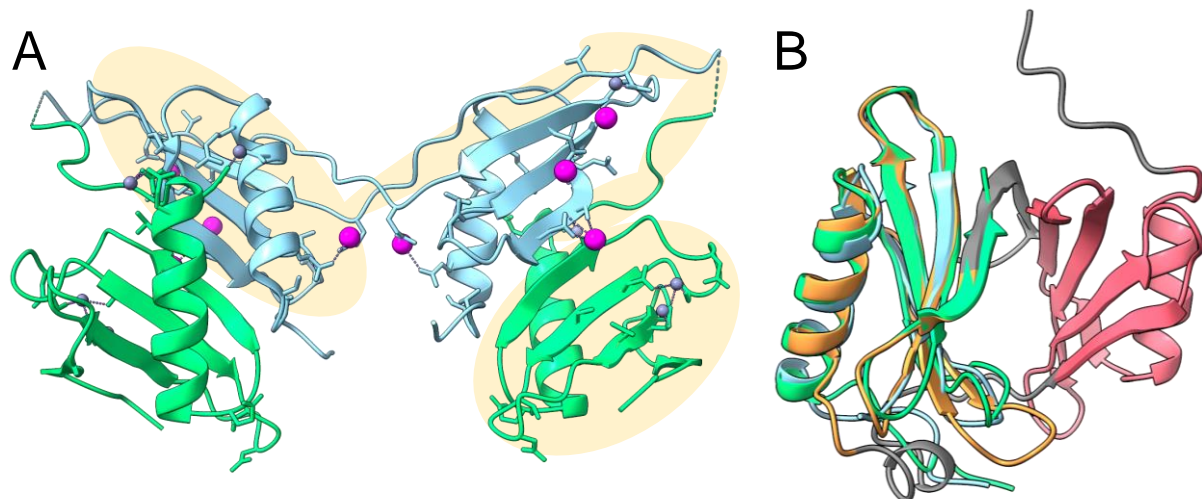

**Figure S3.** Structural comparison of UipA (PDB ID 7ATK) and LanP (predicted structure by AlphaFold). **(A)** Crystal structure of the UipA dimer. The two PepSY domains are colored green and blue. The yellow shaded regions represent a single monomer of the domain-swapped dimer. The magenta spheres depict uranium ions, while the smaller grey spheres represent zinc ions. **(B)** Predicted structure of LanP aligned and superimposed with the two individual PepSY domains of UipA (green and blue).



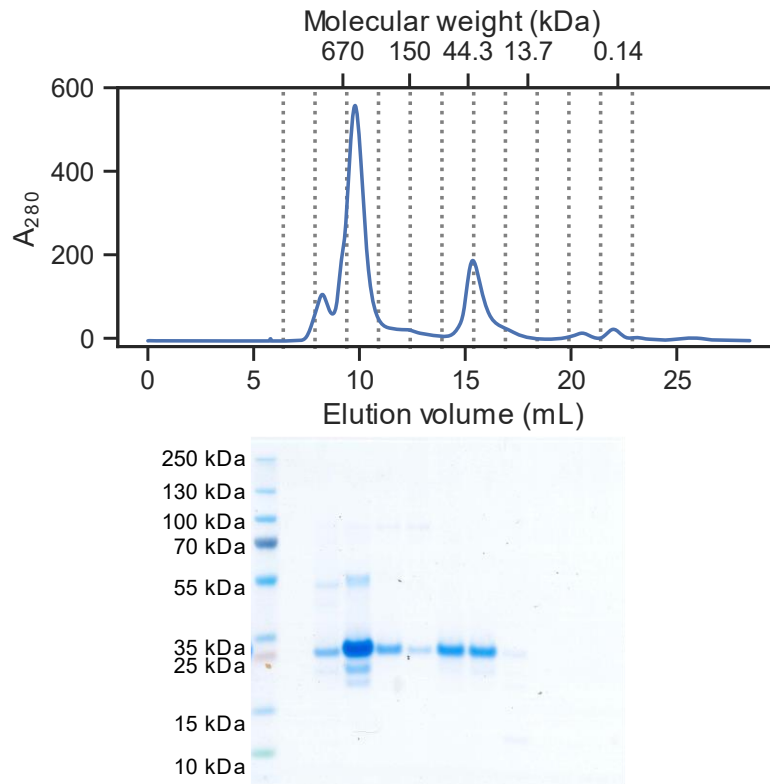

**Figure S4.** Size-exclusion chromatography of affinity-purified His<sub>10</sub>-tagged Mfla\_0908 and SDS-PAGE analysis of the resulting fractions. A Superdex 200 Increase 10/300 GL column (GE Healthcare) was used. The molecular weight axis on top was determined using standards (thyroglobulin,  $\gamma$ -globulins, albumin, ribonuclease A, p-aminobenzoic acid). The fractions indicated by the grey dotted lines were analyzed by SDS-PAGE as shown on the gel below.

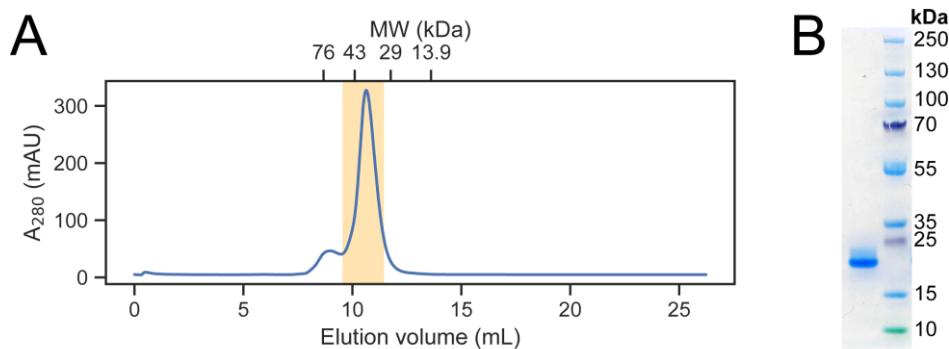

**Figure S5.** Purification of untagged LanP (Mfla\_0908) expressed in *E. coli*. **(A)** Size-exclusion chromatogram (Superdex 75 10/300 GL) after two steps of anion-exchange chromatography. The top axis represents the elution volumes of molecular weight standards. The yellow shaded area depicts the fractions that were combined to yield pure protein. **(B)** SDS-PAGE analysis of 1  $\mu$ g of size-exclusion purified LanP.

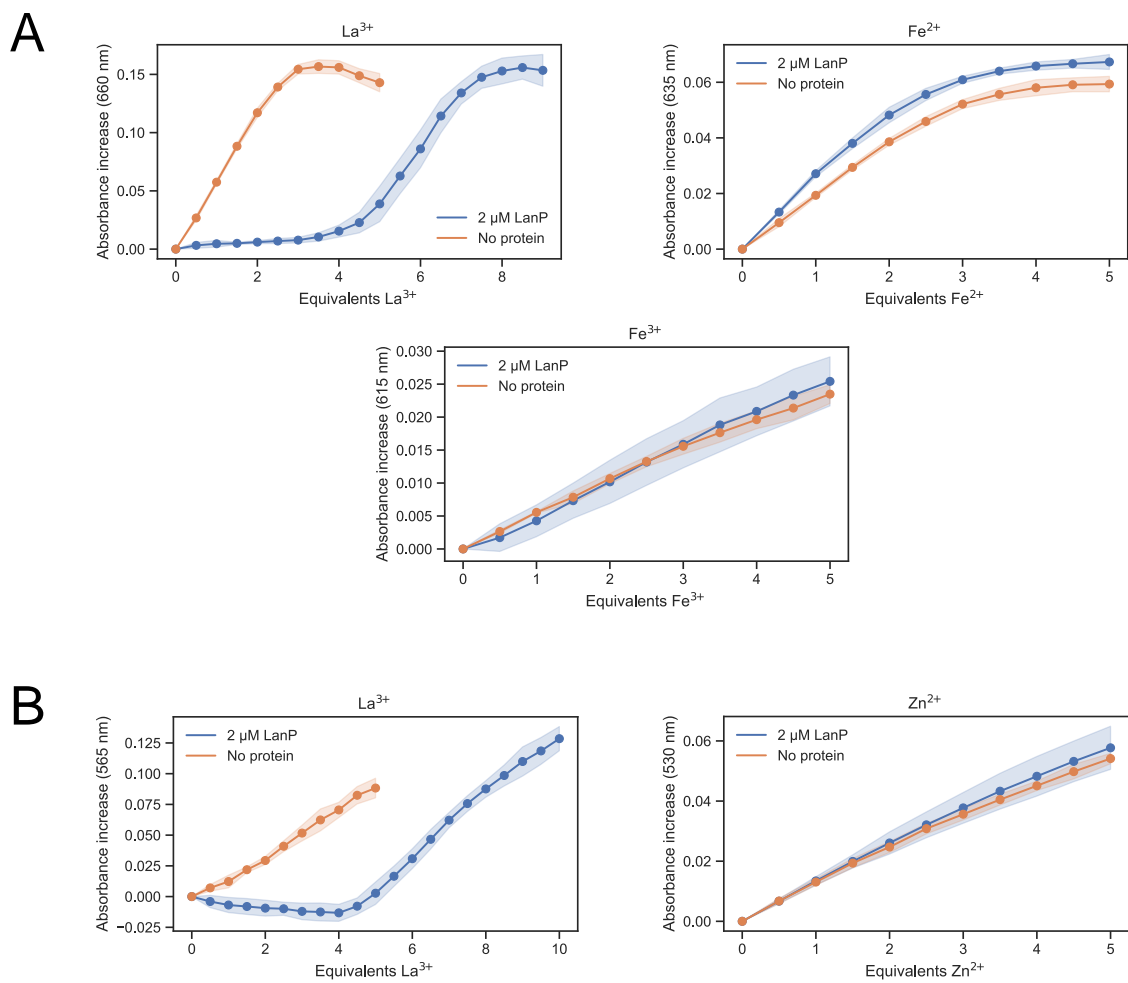

**Figure S6.** Dye competition assays performed using 2 μM LanP (Mfla\_0908) and different metal ions. The non-lanthanide metals required different dyes (10 μM) and wavelengths for the assay to work optimally. **(A)** Competition assays performed using La<sup>3+</sup> (control), Fe<sup>2+</sup>, and Fe<sup>3+</sup> with arsenazo III as dye. **(B)** Competition assays performed using La<sup>3+</sup> (control) and Zn<sup>2+</sup> with xylenol orange as dye.
